# Supplementary material
Source: Springer Nature journal article supplement (https://www.springermedizin.de/resource/supplementary/12974_2014_978_MOESM4_ESM.pdf/9600560)

A

*Tlr4*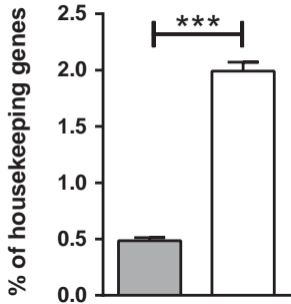

B

*Tlr9*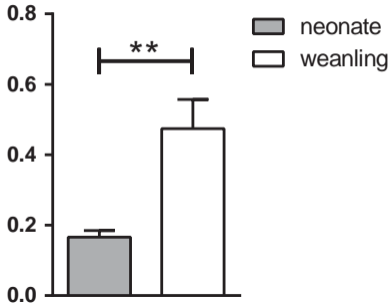

Supplement: MOESM4 [file 9600560]
